# Supplementary material for: A systematic review and meta-analysis of comprehensive interventions for pre-school children with autism spectrum disorder (ASD)
Source: PLOS journal article supplement (doi:10.1371/journal.pone.0186502), 2017-12-06
Supplement: S8 (10.1371/journal.pone.0186502.s008) [file journal.pone.0186502.s008]

**S6 Table. Sensitivity analyses on the outcomes that were with significant baseline imbalances**

| Outcome                                                                 | Random effects model |                   |                    |             | Fixed effects model |                    |              |                   |             |                  |
|-------------------------------------------------------------------------|----------------------|-------------------|--------------------|-------------|---------------------|--------------------|--------------|-------------------|-------------|------------------|
|                                                                         | Analysis I           |                   | I <sup>2</sup> (%) | Analysis II |                     | I <sup>2</sup> (%) | Analyses III |                   | Analyses IV |                  |
|                                                                         | p value              | SMD (95%CI)       |                    | p value     | SMD (95%CI)         |                    | p value      | SMD (95%CI)       | p value     | SMD (95%CI)      |
| Developmental quotient (sensitivity analysis)                           | ○ 0.07               | 0.31[-0.02,0.65]  | 26                 | 0.04*       | 0.20[0.00,0.39]     | 0                  | 0.04*        | 0.29[0.01,0.56]   | 0.04*       | 0.20[0.00,0.39]  |
| Expressive language (sensitivity analysis)                              | ○ 0.18               | 0.13[-0.06,0.33]  | 0                  | 0.02*       | 0.18[0.03,0.33]     | 0                  | 0.18         | 0.13[-0.06,0.33]  | 0.02*       | 0.18[0.03,0.33]  |
| Receptive language (sensitivity analysis)                               | 0.30                 | 0.12[-0.11,0.34]  | 24                 | 0.25        | 0.10[-0.07,0.28]    | 10                 | 0.33         | 0.09[-0.09,0.28]  | 0.27        | 0.09[-0.07,0.26] |
| Reciprocity of social intercation towards others (Sensitivity analysis) | ⊙ <0.01*             | 0.53[0.29,0.78]   | 18                 | <0.001***   | 0.53[0.29,0.78]     | 18                 | <0.001***    | 0.51[0.31,0.72]   | <0.001***   | 0.51[0.31,0.72]  |
| Adaptive behaviour (Sensitivity analysis)                               | 0.69                 | -0.04[-0.23,0.15] | 0                  | 0.45        | 0.09[-0.15,0.34]    | 28                 | 0.69         | -0.04[-0.23,0.15] | 0.78        | 0.03[-0.16,0.22] |

p value indicates the value of the test of overall synthesis. SMD indicates standard mean difference of the overall synthesis effect. 95% CI indicates the 95% confidence interval of the standard mean difference of the overall synthesis. \*, \*\*, and \*\*\* indicate statistically significant effectiveness (p<0.05, p<0.01, and P<0.001, respectively) in the analysis. ○

indicates the outcome did not show significant effectiveness in the overall synthesis of Analysis I, but showed significant effectiveness in the sensitivity analysis. ⊙ indicates the outcome showed significant effectiveness in both the overall synthesis of Analysis I and its sensitivity analyses; Analysis II, III, and IV. N/A indicates the analysis with overall synthesis could not be performed because only one study measured the outcome.
